# Supplementary material
Source: HighWire-hosted journal article supplement (http://www.qdcxjkg.com/highwire/filestream/126495/field_highwire_adjunct_files/0/ERJ-00937-2015_Figure_S1.pdf)

Histotype

Budding

Nesting

Stroma

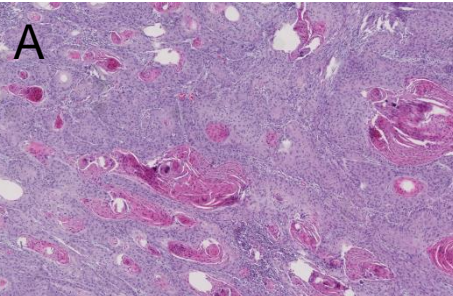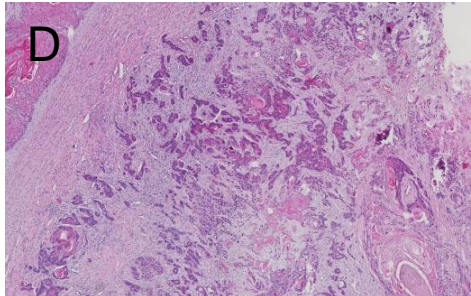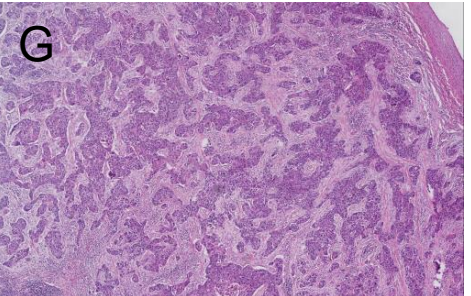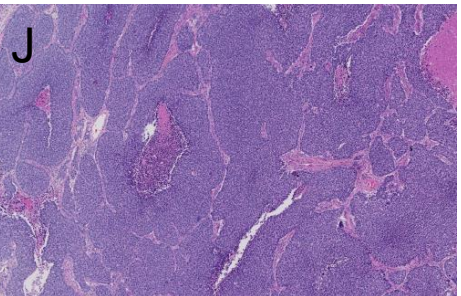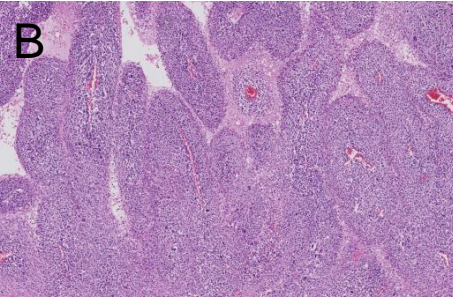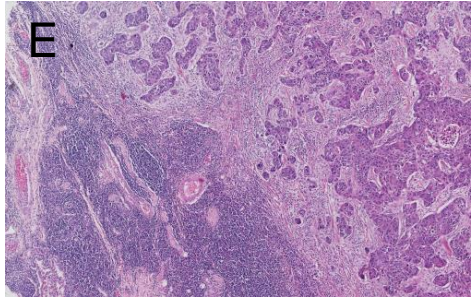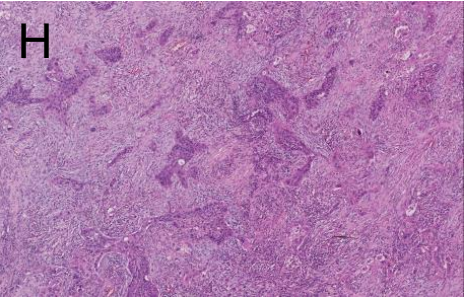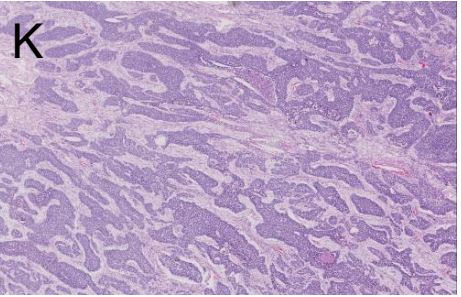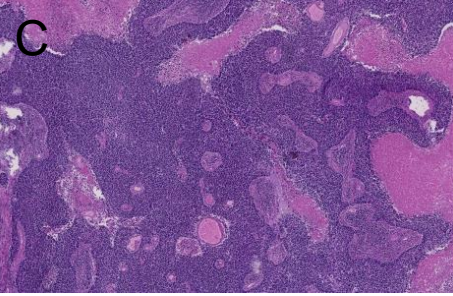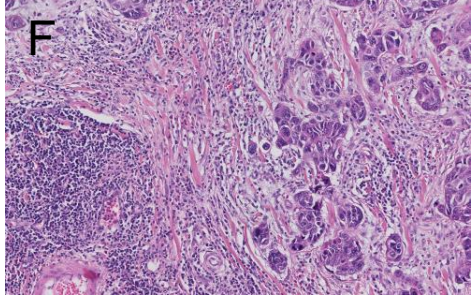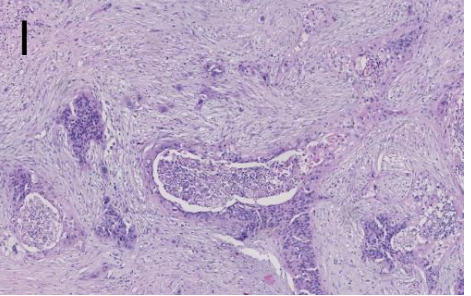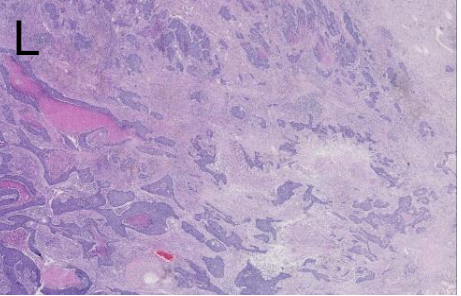

Supplement: ERJ-00937-2015_Figure_S1.pdf [file ERJ-00937-2015_Figure_S1.pdf]
